# Supplementary material
Source: Springer Nature journal article supplement (https://www.springermedizin.de/resource/supplementary/12891_2009_691_MOESM4_ESM.pdf/9506194)

BP                  Non-BP  
 AF Total AF AF Total AF

Observed [95% CI]

Heckbert, 2008

47    87    672    1598

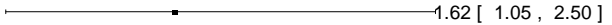

Sorensen, 2008

724    3862    12862    77643

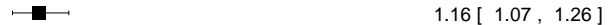

Abrahamsen, 2009

797    14302    1280    28731

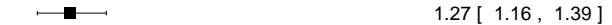

RE Model

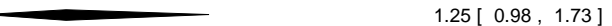

0.76                  1.27                  1.78                  2.28                  2.79

Odds Ratio

Supplement: MOESM4 [file 9506194]
